# Supplementary material for: A 10-Gene Signature to Predict the Prognosis of Early-Stage Triple-Negative Breast Cancer
Source: PubMed Central journal article supplement — Cancer Res Treat. 2024 May 10;56(4):1113–25. doi: 10.4143/crt.2024.100 (PMC11491257; doi:10.4143/crt.2024.100), 2024-05-10
Supplement: crt-2024-100_S1_Fig.pdf [file crt-2024-100_S1_Fig.pdf]

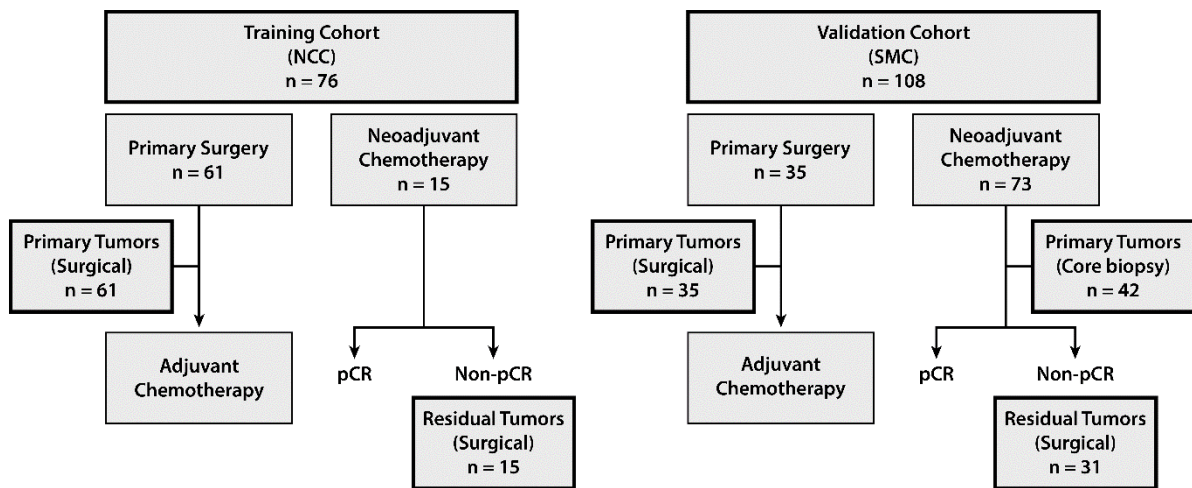

**S1 Fig.** Schematic diagram of patients and samples. NCC, National Cancer Center Korea; pCR, pathologic complete response; SMC, Samsung Medical Center.
