# Supplementary material for: A 10-Gene Signature to Predict the Prognosis of Early-Stage Triple-Negative Breast Cancer
Source: PubMed Central journal article supplement — Cancer Res Treat. 2024 May 10;56(4):1113–25. doi: 10.4143/crt.2024.100 (PMC11491257; doi:10.4143/crt.2024.100), 2024-05-10
Supplement: crt-2024-100_S2_Table.pdf [file crt-2024-100_S2_Table.pdf]

**S2 Table.** Differentially expressed genes correlated in prognostic of triple-negative breast cancer

| No. | Gene              | NT vs. T<br>p-value <sup>a)</sup> | NT vs. T<br>Fold Change | Event vs. non-<br>event<br>p-value <sup>a)</sup> | Event vs.<br>non-event<br>Fold change | Cox<br>p-value |
|-----|-------------------|-----------------------------------|-------------------------|--------------------------------------------------|---------------------------------------|----------------|
| 1   | <i>ANKRD36</i>    | 1.74E-03                          | 1.84                    | 3.25E-02                                         | 1.83                                  | 2.96E-03       |
| 2   | <i>ANKRD36BP2</i> | 6.21E-11                          | 18.48                   | 3.48E-02                                         | 2.02                                  | 9.16E-04       |
| 3   | <i>BSPRY</i>      | 1.40E-11                          | 17.68                   | 1.07E-02                                         | 2.11                                  | 9.57E-04       |
| 4   | <i>C12orf65</i>   | 3.02E-12                          | 4.32                    | 5.00E-05                                         | -1.67                                 | 2.37E-03       |
| 5   | <i>C1orf198</i>   | 3.22E-12                          | 7.13                    | 2.93E-02                                         | 1.55                                  | 2.17E-04       |
| 6   | <i>CCDC114</i>    | 8.71E-03                          | 1.91                    | 1.21E-02                                         | 2.06                                  | 2.36E-04       |
| 7   | <i>CLDN4</i>      | 4.35E-10                          | 6.70                    | 3.94E-03                                         | 1.89                                  | 1.48E-02       |
| 8   | <i>CUEDC1</i>     | 2.42E-07                          | 2.79                    | 1.25E-02                                         | 1.63                                  | 1.60E-02       |
| 9   | <i>DCLK2</i>      | 3.36E-05                          | 2.12                    | 1.30E-02                                         | 1.78                                  | 4.08E-04       |
| 10  | <i>DGKH</i>       | 1.32E-10                          | 8.43                    | 5.93E-04                                         | 2.00                                  | 2.12E-04       |
| 11  | <i>DIP2B</i>      | 2.84E-12                          | 6.36                    | 5.11E-03                                         | 1.69                                  | 3.34E-03       |
| 12  | <i>DISC1</i>      | 2.73E-04                          | 2.16                    | 2.37E-02                                         | 1.57                                  | 2.47E-02       |
| 13  | <i>EMP1</i>       | 6.35E-08                          | 3.00                    | 1.30E-02                                         | 1.89                                  | 1.88E-04       |
| 14  | <i>GADD45B</i>    | 4.63E-11                          | 6.12                    | 1.46E-02                                         | 1.59                                  | 6.62E-03       |
| 15  | <i>GLS</i>        | 2.84E-12                          | 17.00                   | 3.77E-03                                         | 1.57                                  | 1.44E-02       |
| 16  | <i>GYPC</i>       | 1.83E-07                          | 2.91                    | 3.25E-02                                         | -1.56                                 | 3.82E-02       |
| 17  | <i>H2AFX</i>      | 2.84E-12                          | 34.69                   | 9.89E-03                                         | -1.58                                 | 4.62E-02       |
| 18  | <i>HRAS</i>       | 9.15E-04                          | 1.65                    | 7.76E-03                                         | -1.66                                 | 2.49E-02       |
| 19  | <i>KLF6</i>       | 1.04E-02                          | -1.25                   | 4.26E-02                                         | 1.82                                  | 2.41E-02       |
| 20  | <i>KLF7</i>       | 2.20E-02                          | -1.42                   | 2.05E-02                                         | 1.72                                  | 2.28E-04       |
| 21  | <i>LYST</i>       | 2.48E-10                          | 3.41                    | 2.28E-02                                         | 1.81                                  | 1.00E-04       |
| 22  | <i>MALAT1</i>     | 3.48E-10                          | -3.29                   | 2.64E-02                                         | 1.80                                  | 1.94E-03       |
| 23  | <i>MCM3AP.AS1</i> | 6.58E-11                          | 6.76                    | 1.30E-02                                         | 1.64                                  | 1.34E-03       |
| 24  | <i>MICALL2</i>    | 2.47E-05                          | 2.18                    | 2.64E-02                                         | -1.64                                 | 2.39E-02       |
| 25  | <i>MT2A</i>       | 3.22E-12                          | 30.27                   | 5.11E-03                                         | 1.78                                  | 4.21E-04       |
| 26  | <i>NBPF20</i>     | 3.22E-12                          | -6.01                   | 3.60E-02                                         | 1.51                                  | 4.17E-03       |
| 27  | <i>NOTCH2</i>     | 9.75E-12                          | 4.35                    | 1.83E-02                                         | 1.95                                  | 1.17E-04       |
| 28  | <i>NOXA1</i>      | 6.87E-06                          | 3.14                    | 3.48E-02                                         | 2.00                                  | 9.83E-05       |
| 29  | <i>NPR3</i>       | 3.39E-03                          | 4.12                    | 1.70E-02                                         | 4.13                                  | 5.60E-05       |
| 30  | <i>NR6A1</i>      | 6.43E-10                          | 4.62                    | 3.25E-02                                         | 1.69                                  | 1.29E-02       |
| 31  | <i>PAK3</i>       | 1.78E-02                          | 2.41                    | 2.93E-02                                         | -2.36                                 | 4.49E-02       |
| 32  | <i>PARD6B</i>     | 5.20E-11                          | 7.99                    | 2.28E-02                                         | 1.66                                  | 1.61E-03       |
| 33  | <i>PEX1</i>       | 2.84E-12                          | 9.00                    | 2.30E-03                                         | 1.73                                  | 4.07E-02       |
| 34  | <i>PRICKLE1</i>   | 7.84E-11                          | 6.87                    | 5.80E-03                                         | 1.53                                  | 2.55E-02       |
| 35  | <i>PYCARD</i>     | 2.84E-12                          | 13.06                   | 3.30E-03                                         | -1.79                                 | 2.85E-02       |
| 36  | <i>RASA1</i>      | 3.42E-12                          | 4.80                    | 4.40E-02                                         | 1.81                                  | 6.45E-04       |
| 37  | <i>RASD2</i>      | 4.39E-12                          | 24.12                   | 2.45E-02                                         | 2.16                                  | 5.51E-03       |
| 38  | <i>RASGRP1</i>    | 2.84E-12                          | 43.46                   | 1.83E-02                                         | 2.22                                  | 8.07E-05       |
| 39  | <i>RHPN2</i>      | 2.27E-11                          | 13.39                   | 2.00E-03                                         | 1.87                                  | 2.92E-02       |
| 40  | <i>ROBO1</i>      | 8.91E-09                          | 4.12                    | 4.85E-02                                         | -1.76                                 | 4.27E-02       |
| 41  | <i>RORA</i>       | 1.28E-08                          | 3.98                    | 2.93E-02                                         | 1.59                                  | 3.61E-03       |
| 42  | <i>SERTAD4</i>    | 6.58E-11                          | 14.86                   | 9.13E-03                                         | 1.91                                  | 3.45E-03       |
| 43  | <i>SLC22A20</i>   | 1.83E-07                          | 4.94                    | 3.61E-03                                         | 2.69                                  | 1.86E-04       |
| 44  | <i>SLC24A3</i>    | 5.49E-04                          | 2.57                    | 1.46E-02                                         | 1.88                                  | 2.28E-03       |
| 45  | <i>SLC2A12</i>    | 1.66E-10                          | 18.89                   | 1.90E-02                                         | 2.55                                  | 1.40E-02       |
| 46  | <i>SLC39A10</i>   | 8.63E-12                          | 7.20                    | 3.14E-02                                         | 1.73                                  | 4.61E-03       |
| 47  | <i>SLC43A1</i>    | 1.37E-03                          | 1.67                    | 2.76E-03                                         | -1.74                                 | 2.20E-02       |
| 48  | <i>SLC45A4</i>    | 3.06E-11                          | 4.30                    | 4.69E-03                                         | 1.77                                  | 1.16E-04       |
| 49  | <i>SLC6A20</i>    | 8.93E-03                          | 2.63                    | 3.45E-03                                         | 2.86                                  | 1.65E-03       |

|    |                |          |        |          |      |          |
|----|----------------|----------|--------|----------|------|----------|
| 50 | <i>STAG3L3</i> | 3.64E-12 | 6.44   | 1.31E-03 | 1.66 | 1.93E-04 |
| 51 | <i>TCTE3</i>   | 2.84E-12 | 109.73 | 2.93E-02 | 1.52 | 1.14E-03 |
| 52 | <i>TMCC2</i>   | 4.11E-11 | 9.92   | 3.02E-03 | 1.98 | 3.95E-04 |
| 53 | <i>TRPS1</i>   | 1.23E-04 | 2.59   | 4.12E-02 | 1.56 | 2.11E-02 |
| 54 | <i>TYW5</i>    | 2.84E-12 | 11.58  | 1.66E-03 | 2.65 | 4.39E-03 |
| 55 | <i>UBE2W</i>   | 3.42E-12 | 9.91   | 1.30E-02 | 1.50 | 3.33E-03 |
| 56 | <i>WDSUB1</i>  | 2.84E-12 | 20.06  | 3.77E-03 | 1.56 | 2.46E-03 |
| 57 | <i>WDYHVI</i>  | 2.84E-12 | 15.31  | 5.80E-03 | 1.55 | 1.73E-02 |
| 58 | <i>ZHX2</i>    | 1.32E-11 | 4.29   | 2.45E-02 | 1.63 | 9.63E-03 |
| 59 | <i>ZNF469</i>  | 2.56E-11 | 11.30  | 1.97E-02 | 2.57 | 9.20E-05 |

Event, recurrence or metastasis; non-event, non-recurrence and non-metastasis; NT, non-tumor; T, tumor. <sup>a)</sup>p-values were calculated using the Wilcoxon test.
