# Supplementary material for: A 10-Gene Signature to Predict the Prognosis of Early-Stage Triple-Negative Breast Cancer
Source: PubMed Central journal article supplement — Cancer Res Treat. 2024 May 10;56(4):1113–25. doi: 10.4143/crt.2024.100 (PMC11491257; doi:10.4143/crt.2024.100), 2024-05-10
Supplement: crt-2024-100_S5_Fig.pdf [file crt-2024-100_S5_Fig.pdf]

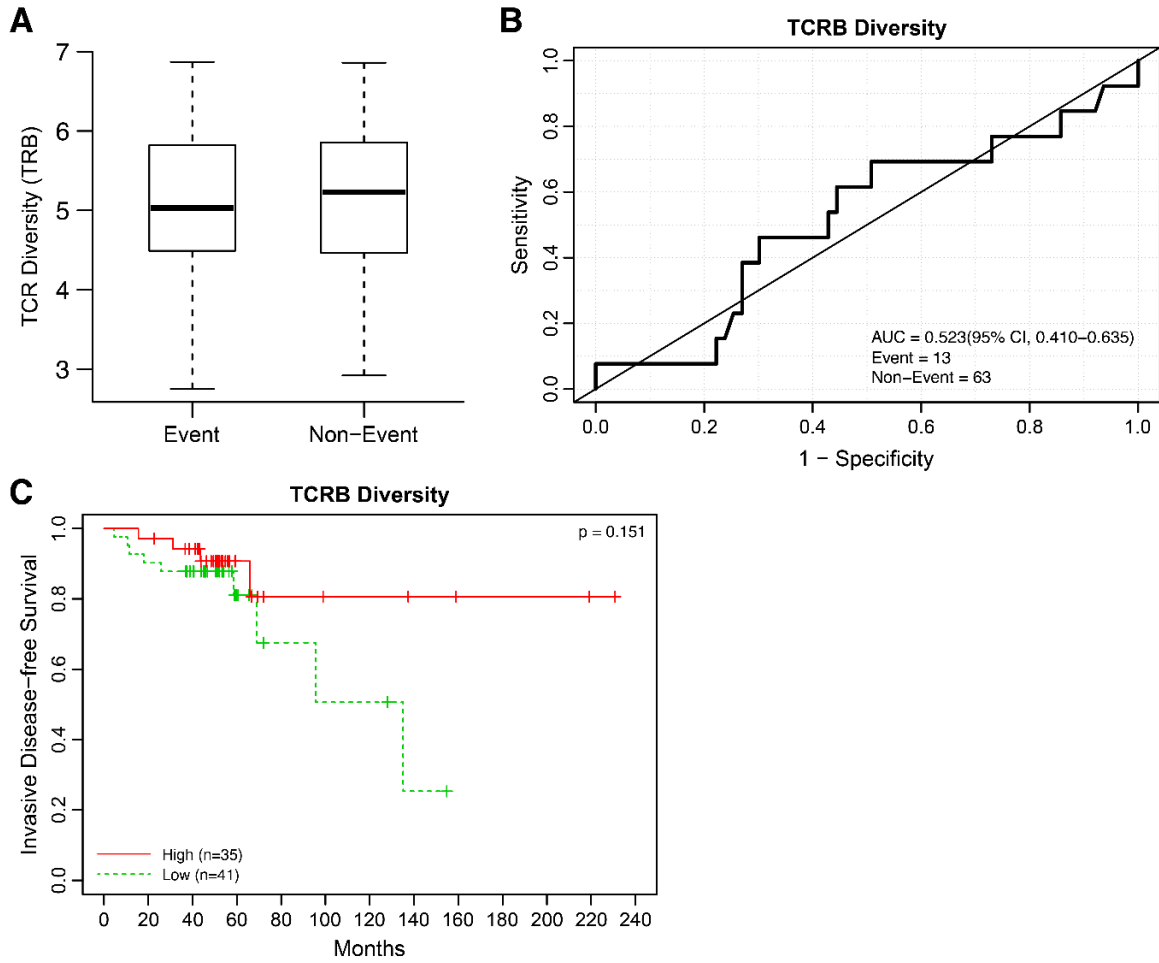

**S5 Fig.** TCR $\beta$  diversity analysis. Event, recurrence or metastasis; non-event, non-recurrence and non-metastasis; TCR $\beta$ , T cell receptor beta locus.
