# Supplementary material for: A 10-Gene Signature to Predict the Prognosis of Early-Stage Triple-Negative Breast Cancer
Source: PubMed Central journal article supplement — Cancer Res Treat. 2024 May 10;56(4):1113–25. doi: 10.4143/crt.2024.100 (PMC11491257; doi:10.4143/crt.2024.100), 2024-05-10
Supplement: crt-2024-100_S6_Table.pdf [file crt-2024-100_S6_Table.pdf]

**S6 Table.** Pathways and interacting genes associated with the gene signature and prognostic features

|                   | <b>Name of pathway/Interacting genes</b>                                                                                                                           |
|-------------------|--------------------------------------------------------------------------------------------------------------------------------------------------------------------|
| Pathways          | Pathways in cancer<br>PI3K-Akt signaling pathway<br>Alzheimer disease<br>Human cytomegalovirus infection<br>Hepatitis C<br>Breast cancer<br>MAPK signaling pathway |
| Interacting genes | KRAS<br>HRAS<br>APP                                                                                                                                                |

APP, amyloid beta precursor protein; HRAS, HRAS proto-oncogene, GTPase; KRAS, KRAS proto-oncogene, GTPase; MAK, mitogen-activated protein kinase; PI3K, phosphoinositide 3-kinase.
