# Supplementary material for: A 10-Gene Signature to Predict the Prognosis of Early-Stage Triple-Negative Breast Cancer
Source: PubMed Central journal article supplement — Cancer Res Treat. 2024 May 10;56(4):1113–25. doi: 10.4143/crt.2024.100 (PMC11491257; doi:10.4143/crt.2024.100), 2024-05-10
Supplement: crt-2024-100_S7_Table.pdf [file crt-2024-100_S7_Table.pdf]

**S7 Table.** Information of genes composing 10-gene signature

| <b>No.</b> | <b>Gene</b>    | <b>Gene function</b>                                                                                                                              | <b>Related research</b>                                                                                                                                                                                                                                                                                                   | <b>References</b> |
|------------|----------------|---------------------------------------------------------------------------------------------------------------------------------------------------|---------------------------------------------------------------------------------------------------------------------------------------------------------------------------------------------------------------------------------------------------------------------------------------------------------------------------|-------------------|
| 1          | <i>DGKH</i>    | Eta isoform of diacylglycerol kinase family that regulates the intracellular concentration of diacylglycerol                                      | DGKH is known to regulate intracellular concentration of diacylglycerol by conversing to phosphatidic acid and its increased expression is liked with bipolar disorder. preclinical studies have suggested that DGK $\eta$ plays a role in mediating signaling downstream of the epidermal growth factor receptor (EGFR). | [1-3]             |
| 2          | <i>GADD45B</i> | Gene family that regulates various cellular functions, including DNA repair, senescence, and cell cycle control                                   | GADD45 genes play a key role in growth and apoptosis in response to genotoxic stimuli in cancer cells. Previous studies have reported decreased expression of GADD45B in primary breast cancers, but increased expression in inflammatory breast cancer.                                                                  | [4-6]             |
| 3          | <i>KLF7</i>    | One of Kruppel-like factors, which are known to regulate diverse cellular processes including cell proliferation, differentiation, and metabolism | Several studies have shown that repressed expression of KLF7 by miRNAs inhibited cancer cells. Based on the current evidence, KLF7 seems to be related to the biology and progression of breast cancer.                                                                                                                   | [7-10]            |
| 4          | <i>LYST</i>    | Key regulator of secretory lysosome biogenesis in the immune system                                                                               | Its deficiency inhibits proliferation and induces apoptosis in myeloma.                                                                                                                                                                                                                                                   | [11,12]           |
| 5          | <i>NR6A1</i>   | Orphan nuclear receptor that regulates the development of germ cells                                                                              | Up-regulated NR6A1 induced gastric cancer proliferation, migration, and invasion via hsa_circ_001653. NR6A1 expression was identified as a potential biomarker for prostate cancer.                                                                                                                                       | [13-16]           |
| 6          | <i>PYCARD</i>  | Regulator of inflammation with a N-terminal PYRIN-PAAD-DAPIN domain (PYD) and C-terminal caspase-recruitment domain (CARD)                        | PYCARD has been suggested as an independent prognostic predictor in glioma.                                                                                                                                                                                                                                               | [17-19]           |
| 7          | <i>ROBO1</i>   | Plays an important role in the development of various normal organs and is involved in cancers including breast cancer, where it                  | ROBO1 expression is associated with the prognosis of breast cancer.                                                                                                                                                                                                                                                       | [20-22]           |

|    |                  |                                                                                                                                                                                 |                                                                                                                                                     |            |
|----|------------------|---------------------------------------------------------------------------------------------------------------------------------------------------------------------------------|-----------------------------------------------------------------------------------------------------------------------------------------------------|------------|
|    |                  | plays key roles in migration and invasion                                                                                                                                       |                                                                                                                                                     |            |
| 8  | <i>SLC22A20P</i> | Belong to solute carrier family, which are secondary membrane transporter translocating soluble molecules, organic cation/anion/zwitterion transporter family                   | <i>SLC22A20P</i> is pseudogene in human, but has novel roles in homeostasis in mouse.                                                               | [23-25]    |
| 9  | <i>SLC24A3</i>   | Belong to solute carrier family, which are secondary membrane transporter translocating soluble molecules, Na <sup>+</sup> /(Ca <sup>+</sup> -K <sup>+</sup> ) exchanger family | <i>SLC24A3</i> is abundantly expressed in brain and smooth muscle.                                                                                  | [23,24,26] |
| 10 | <i>SLC45A4</i>   | Belong to solute carrier family, which are secondary membrane transporter translocating soluble molecules, putative sugar transporter                                           | <i>SLC45A4</i> is known to up-regulated in pancreatic ductal adenocarcinoma. Its oncogenic role is to support cell proliferation by glucose uptake. | [27,28]    |

## References

1. Kittel-Schneider S, Lorenz C, Auer J, Weissflog L, Reif A. DGKH genetic risk variant influences gene expression in bipolar affective disorder. *J Affect Disord.* 2016;198:148-57.
2. Weissflog L, Becker N, Bossert N, Freudenberg F, Kittel-Schneider S, Reif A. Expressional profile of the diacylglycerol kinase eta gene DGKH. *Eur Arch Psychiatry Clin Neurosci.* 2017;267:445-54.
3. Cai J, Crotty TM, Reichert E, Carraway KL, 3rd, Stafforini DM, Topham MK. Diacylglycerol kinase delta and protein kinase C(alpha) modulate epidermal growth factor receptor abundance and degradation through ubiquitin-specific protease 8. *J Biol Chem.* 2010;285:6952-9.
4. Lerebours F, Vacher S, Andrieu C, Espie M, Marty M, Lidereau R, et al. NF-kappa B genes have a major role in inflammatory breast cancer. *BMC Cancer.* 2008;8:41.
5. Bjarnadottir O, Kimbung S, Johansson I, Veerla S, Jonsson M, Bendahl PO, et al. Global transcriptional changes following statin treatment in breast cancer. *Clin Cancer Res.* 2015;21:3402-11.
6. Ouhtit A, Gaur RL, Abdraboh M, Ireland SK, Rao PN, Raj SG, et al. Simultaneous inhibition of cell-cycle, proliferation, survival, metastatic pathways and induction of apoptosis in breast cancer cells by a phytochemical super-cocktail: genes that underpin its mode of action. *J Cancer.* 2013;4:703-15.
7. Lyu J, Wang J, Miao Y, Xu T, Zhao W, Bao T, et al. KLF7 is associated with poor prognosis and regulates migration and adhesion in tongue cancer. *Oral Dis.* 2022;28:577-84.

8. Yao J, Zhang H, Liu C, Chen S, Qian R, Zhao K. miR-450b-3p inhibited the proliferation of gastric cancer via regulating KLF7. *Cancer Cell Int.* 2020;20:47.
9. Zhao L, Zhang Y, Liu J, Yin W, Jin D, Wang D, et al. miR-185 inhibits the proliferation and invasion of non-small cell lung cancer by targeting KLF7. *Oncol Res.* 2019;27:1015-23.
10. Zhang D, Ding X, Peng M. LncRNA SNHG14 accelerates breast cancer progression through sponging miR-543 and regulating KLF7 expression. *Arch Gynecol Obstet.* 2022;305:1507-16.
11. Holt OJ, Gallo F, Griffiths GM. Regulating secretory lysosomes. *J Biochem.* 2006;140:7-12.
12. Bong IP, Ng CC, Fakiruddin SK, Lim MN, Zakaria Z. Small interfering RNA-mediated silencing of nicotinamide phosphoribosyltransferase (NAMPT) and lysosomal trafficking regulator (LYST) induce growth inhibition and apoptosis in human multiple myeloma cells: A preliminary study. *Bosn J Basic Med Sci.* 2016;16:268-75.
13. Sabour D, Xu X, Chung AC, Le Menuet D, Ko K, Tapia N, et al. Germ cell nuclear factor regulates gametogenesis in developing gonads. *PLoS One.* 2014;9:e103985.
14. Zhou W, Jiang R, Wang Y, Li Y, Sun Z, Zhao H. hsa\_circ\_001653 up-regulates NR6A1 expression and elicits gastric cancer progression by binding to microRNA-377. *Exp Physiol.* 2020;105:2141-53.
15. Cheng G, Wang S, Li X, Li S, Zheng Y, Zhang L, et al. Positive expression of NR6A1/CT150 as a predictor of biochemical recurrence-free survival in prostate cancer patients. *Oncotarget.* 2017;8:64427-39.
16. Mathieu R, Evrard B, Fromont G, Rioux-Leclercq N, Godet J, Cathelineau X, et al. Expression screening of cancer/testis genes in prostate cancer identifies NR6A1 as a novel marker of disease progression and aggressiveness. *Prostate.* 2013;73:1103-14.
17. Nambayan RJT, Sandin SI, Quint DA, Satyadi DM, de Alba E. The inflammasome adapter ASC assembles into filaments with integral participation of its two Death Domains, PYD and CARD. *J Biol Chem.* 2019;294:439-52.
18. Liang A, Zhong S, Xi B, Zhou C, Jiang X, Zhu R, et al. High expression of PYCARD is an independent predictor of unfavorable prognosis and chemotherapy resistance in glioma. *Ann Transl Med.* 2021;9:986.
19. Collard RL, Harya NS, Monzon FA, Maier CE, O'Keefe DS. Methylation of the ASC gene promoter is associated with aggressive prostate cancer. *Prostate.* 2006;66:687-95.
20. Kim SH, Kim TJ, Shin D, Hur KJ, Hong SH, Lee JY, et al. ROBO1 protein expression is independently associated with biochemical recurrence in prostate cancer patients who underwent radical prostatectomy in Asian patients. *Gland Surg.* 2021;10:2956-65.
21. Zhang L, Qin Y, Wu G, Wang J, Cao J, Wang Y, et al. PRRG4 promotes breast cancer metastasis through the recruitment of NEDD4 and downregulation of Robo1. *Oncogene.* 2020;39:7196-208.

22. Wang J, Wang L, Liu FF, Ma YJ, Fu L, Li WL, et al. Robo1 expression in breast cancer and its relationship to brain metastasis. *Zhonghua Zhong Liu Za Zhi*. 2011;33:447-51.
23. Perland E, Fredriksson R. Classification systems of secondary active transporters. *Trends Pharmacol Sci*. 2017;38:305-15.
24. Hediger MA, Romero MF, Peng JB, Rolfs A, Takanaga H, Bruford EA. The ABCs of solute carriers: physiological, pathological and therapeutic implications of human membrane transport proteinsIntroduction. *Pflugers Arch*. 2004;447:465-8.
25. Nigam SK. The SLC22 transporter family: a paradigm for the impact of drug transporters on metabolic pathways, signaling, and disease. *Annu Rev Pharmacol Toxicol*. 2018;58:663-87.
26. Kraev A, Quednau BD, Leach S, Li XF, Dong H, Winkfein R, et al. Molecular cloning of a third member of the potassium-dependent sodium-calcium exchanger gene family, NCKX3. *J Biol Chem*. 2001;276:23161-72.
27. Vitavska O, Wieczorek H. The SLC45 gene family of putative sugar transporters. *Mol Aspects Med*. 2013;34:655-60.
28. Chen W, Huang F, Huang J, Li Y, Peng J, Zhuang Y, et al. SLC45A4 promotes glycolysis and prevents AMPK/ULK1-induced autophagy in TP53 mutant pancreatic ductal adenocarcinoma. *J Gene Med*. 2021;23:e3364.
