# Supplementary figures and images for: A 10-Gene Signature to Predict the Prognosis of Early-Stage Triple-Negative Breast Cancer
Source: PubMed Central journal article supplement — Cancer Res Treat. 2024 May 10;56(4):1113–25. doi: 10.4143/crt.2024.100 (PMC11491257; doi:10.4143/crt.2024.100), 2024-05-10

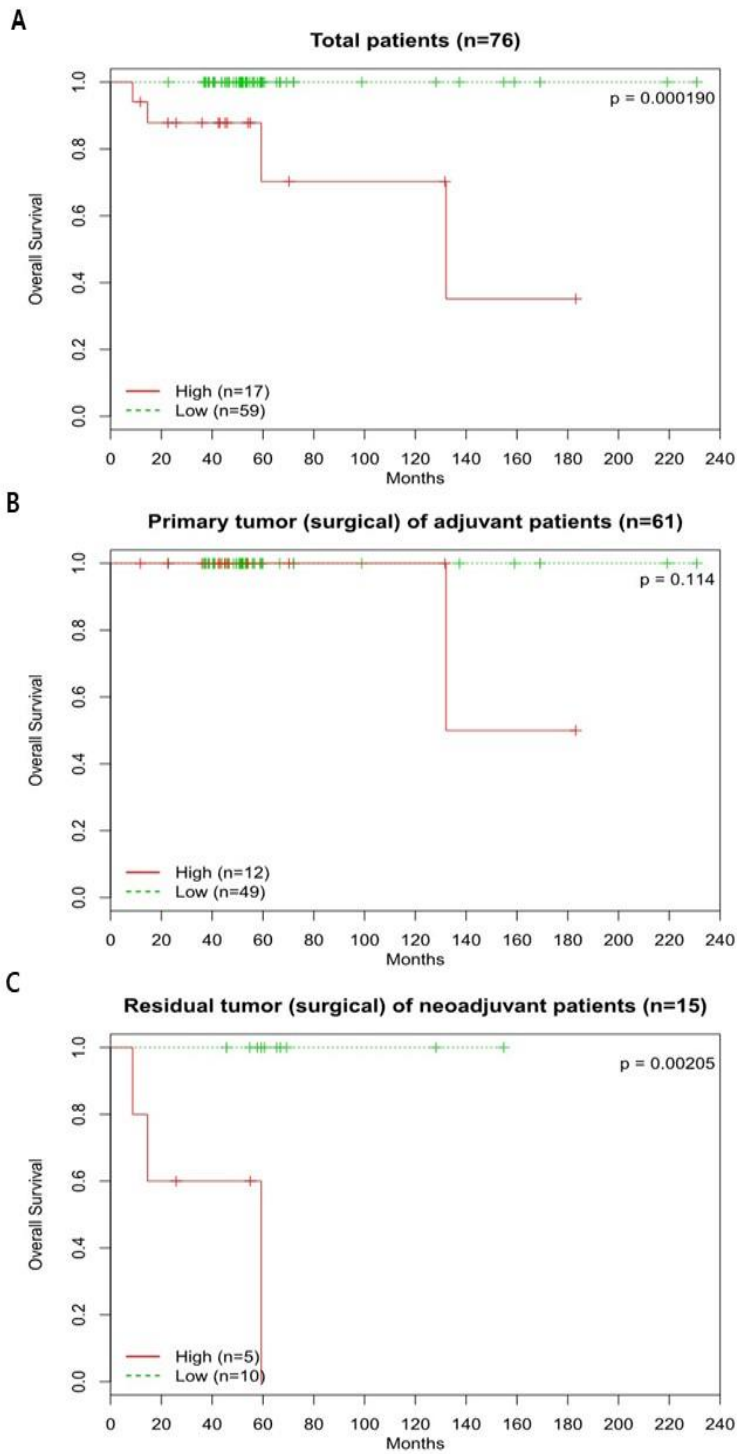

**S3 Fig.** Overall survival analysis in training set according to gene signature.

Supplement: crt-2024-100_S3_Fig.pdf [file crt-2024-100_S3_Fig.pdf]

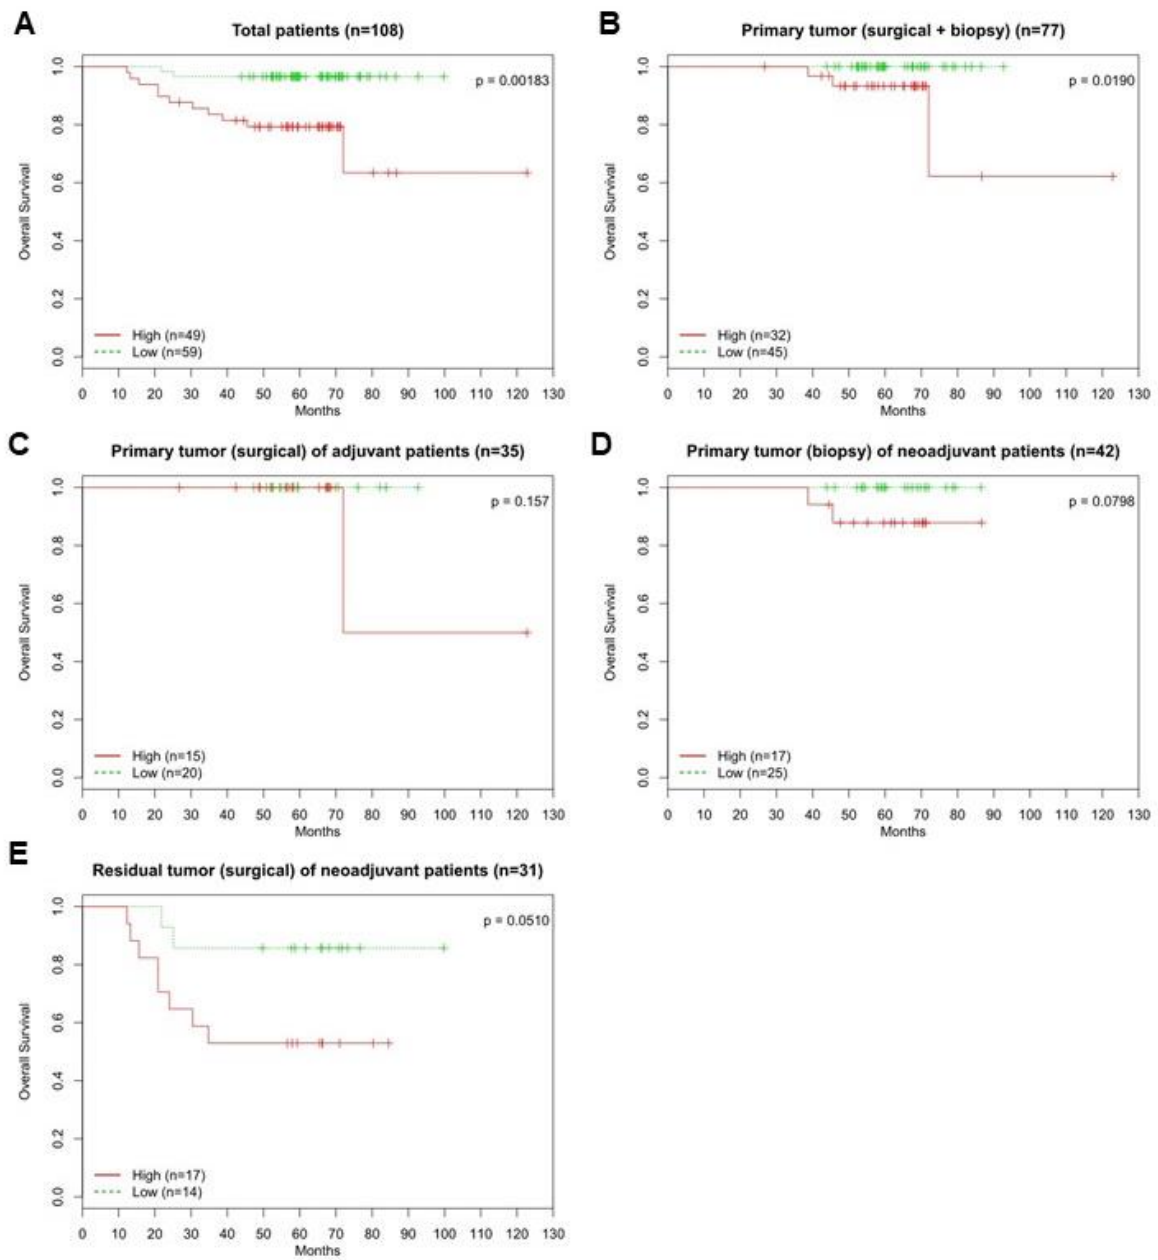

**S4 Fig.** Overall survival analysis in validation set according to gene signature.

Supplement: crt-2024-100_S4_Fig.pdf [file crt-2024-100_S4_Fig.pdf]

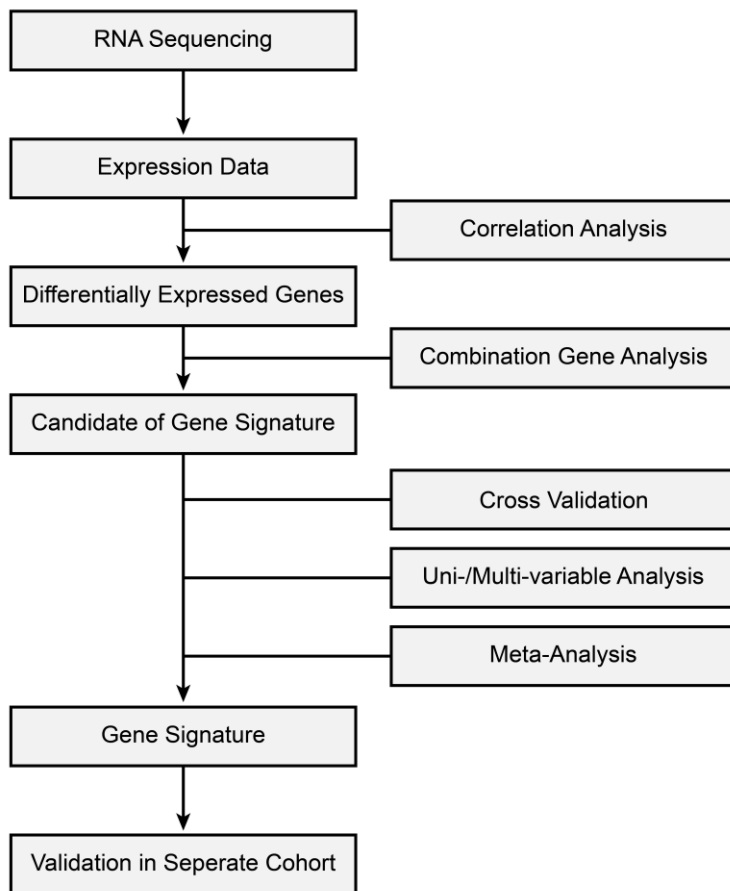

**S8 Fig.** Flow chart of biomarker development.

Supplement: crt-2024-100_S8_Fig.pdf [file crt-2024-100_S8_Fig.pdf]
